# Supplementary material for: An effector protein of the wheat stripe rust fungus targets chloroplasts and suppresses chloroplast function
Source: PubMed Central journal article supplement (PMC6895047; doi:10.1038/s41467-019-13487-6), 2019-12-05
Supplement: 41467_2019_13487_MOESM2_ESM.pdf [file 41467_2019_13487_MOESM2_ESM.pdf]

## Description of Additional Supplementary Files

File Name: Supplementary Data 1

Description: Brief description of potential targets of Pst\_12806 using the Y2H system

File Name: Supplementary Data 2

Description: Primers used in this study
