# Supplementary material for: An effector protein of the wheat stripe rust fungus targets chloroplasts and suppresses chloroplast function
Source: PubMed Central journal article supplement (PMC6895047; doi:10.1038/s41467-019-13487-6), 2019-12-05
Supplement: 41467_2019_13487_MOESM3_ESM.pdf [file 41467_2019_13487_MOESM3_ESM.pdf]

**Supplementary Data 1 Brief description of potential targets of Pst\_12806 using the Y2H system**

| Times | Candidate targets                                             | Gene bank    | Species                                    |
|-------|---------------------------------------------------------------|--------------|--------------------------------------------|
| 9     | chloroplast fructose-1,6-biphosphate aldolase                 | A0A3B6RIU4   | Triticum aestivum                          |
| 4     | unnamed protein product (DUF538 domain)                       | CDM86991     | Triticum aestivum                          |
| 3     | isocitrate lyase                                              | AKG97058     | Triticum aestivum                          |
| 2     | E3 ubiquitin-protein ligase SINA-like 6                       | CDM80861     | Triticum aestivum                          |
| 2     | homeobox-leucine zipper protein ROC9                          | CDM84292     | Triticum aestivum                          |
| 2     | putative Rieske Fe-S precursor (TaISP)                        | AAM88439     | Triticum aestivum                          |
| 1     | 40S ribosomal protein S28                                     | CDM87113     | Triticum aestivum                          |
| 1     | bZIP transcription factor family protein                      | CAW48329     | Triticum aestivum                          |
| 1     | Shaggy-like kinase                                            | AGK41248     | Triticum aestivum                          |
| 1     | superoxide dismutase (mitochondrion)                          | ACO90195     | Triticum aestivum                          |
| 1     | Phosphoribulokinase, chloroplatic                             | CAA41020     | Triticum aestivum                          |
| 1     | ankyrin-1-like isoform X1                                     | CDM81963     | Triticum aestivum                          |
| 1     | ribulose-1,5-bisphosphate carboxylase/oxygenase small subunit | BAB19815     | Triticum aestivum                          |
| 1     | chloroplast inositol phosphatase-like protein                 | AAU82110     | Triticum aestivum                          |
| 1     | serine/threonine-protein phosphatase 6                        | CDM82750     | Triticum aestivum                          |
| 1     | geranylgeranyl hydrogenase                                    | AAZ67145.2   | Triticum aestivum                          |
| 1     | eukaryotic transcription factor NF-Y subunit C                | AJS09958     | Triticum aestivum                          |
| 1     | transcription factor TGAL1                                    | CAW48333     | Triticum aestivum                          |
| 2     | Elongation factor 2                                           | EMS67172     | Triticum urartu                            |
| 1     | Glycine dehydrogenase [decarboxylating] B, mitochondrial      | EMS46370     | Triticum urartu                            |
| 1     | NAC domain-containing protein 7                               | EMS66030     | Triticum urartu                            |
| 1     | Lactation elevated protein 1                                  | EMS61152     | Triticum urartu                            |
| 1     | putative calcium-binding protein CML27                        | EMS63062     | Triticum urartu                            |
| 1     | protein ACCELERATED CELL DEATH 6-like                         | EMS35691     | Triticum urartu                            |
| 1     | MFS transporter                                               | EMS62968     | Triticum urartu                            |
| 2     | 60S ribosomal protein L10-2                                   | XP_020147355 | Aegilops tauschii subsp. Tauschii          |
| 1     | TPR repeat-containing protein ZIP4                            | XP_020157705 | Aegilops tauschii subsp. Tauschii          |
| 1     | Phototropin-2                                                 | XP_020176399 | Aegilops tauschii subsp. Tauschii          |
| 1     | hypothetical protein F775_44012 (HAD_like domain)             | AER62215     | Aegilops tauschii subsp. Tauschii          |
| 1     | flowering locus K homology domain-like                        | XP_020160073 | Aegilops tauschii subsp. Tauschii          |
| 1     | Myb family transcription factor APL                           | XP_020150564 | Aegilops tauschii subsp. Tauschii          |
| 1     | ankyrin repeat-containing protein                             | BAK03736     | Hordeum vulgare subsp. vulgare             |
| 1     | protein scribble homolog isoform X4                           | BAJ99674     | Hordeum vulgare subsp. vulgare             |
| 4     | 2-oxoisovalerate dehydrogenase subunit beta 1, mitochondrial  | XP_003557527 | Brachypodium distachyon                    |
| 2     | HAUS augmin-like complex subunit 5                            | XP_003578074 | Brachypodium distachyon                    |
| 1     | GDSL esterase/lipase At2g04570-like                           | XP_024317383 | Brachypodium distachyon                    |
| 1     | mitochondrial import receptor subunit TOM6 homolog            | KQK14113     | Brachypodium distachyon                    |
| 1     | heterogeneous nuclear ribonucleoprotein 1                     | PKU87734     | Brachypodium distachyon                    |
| 1     | protein LIKE COV 1                                            | XP_003568050 | Brachypodium distachyon                    |
| 1     | Cysteinyl-tRNA synthetase                                     | Q0IZQ2       | Oryza sativa Japonica Group                |
| 2     | hypothetical protein PSTG_13411                               | KNE93237     | Puccinia striiformis f. sp. tritici PST-78 |
| 1     | hypothetical protein PSTG_06809                               | KNE99957     | Puccinia striiformis f. sp. tritici PST-78 |
