# Supplementary material for: An effector protein of the wheat stripe rust fungus targets chloroplasts and suppresses chloroplast function
Source: PubMed Central journal article supplement (PMC6895047; doi:10.1038/s41467-019-13487-6), 2019-12-05
Supplement: 41467_2019_13487_MOESM4_ESM.pdf [file 41467_2019_13487_MOESM4_ESM.pdf]

## Supplementary Data 2 Primers used in this study

| Name                               | sequence(5'-3')                                                    | application        |
|------------------------------------|--------------------------------------------------------------------|--------------------|
| HASP268-F                          | gGAATTCGGGGCGATCAGGGCT                                             |                    |
| HASP268-R                          | cgGGATCCTCAATGAGCTTGGACGAGC                                        |                    |
| TalSP-F                            | GGAATTCCATATGATGGCCTCTACCGCGC                                      |                    |
| TalSP-N-F                          | GGAATTCCATATGATGGCCTCTACCGCGCTCTCCA                                |                    |
| TalSP-N-R                          | ccgCTCGAGTTAGCCGGCGGGACGAGGA                                       |                    |
| TalSP-C-F                          | GGAATTCCATATGAAGACGCACGCCCAACG                                     |                    |
| TalSP-C-R                          | ccgCTCGAGTTATTTCCACCACGGGTTGTCCG                                   |                    |
| TalSP-R                            | ccgCTCGAGTTATTTCCACCACGGGTTGT                                      |                    |
| TalSP-PCH-F                        | TTACAATTATCGATACAATGATGGCCTCTACCGCGCTC                             | Interaction assay  |
| TalSP-PCH-R                        | CTCATTAAAGCAGGACAAGCAGCGTAGTCTGGGACGTCGTATGGGTATTTCCACCACGGGTTGTGC |                    |
| Pst_12806 <sup>65-156</sup> -F     | gGAATTCGGGGCGATCAGGGCT                                             |                    |
| Pst_12806 <sup>65-156</sup> -R     | cgGGATCCcATGAGCTTGGACGAGC                                          |                    |
| TalSP-F                            | gGAATTCATGGCCTCTACCGCGCTC                                          |                    |
| TalSP-R                            | cgccccgggTTTCCACCACGGGTTGTGC                                       |                    |
| cTP-YFP-F                          | gGAATTC ATGCGATCAGGGCTGTTGCG                                       |                    |
| cTP-YFP-R                          | cgGGATCCcGGTCTCGATCATAACCCGGTGA                                    |                    |
| cTP-F                              | cccatggATGCGATCAGGGCTGTTGCG                                        |                    |
| cTP-R                              | cgactagtGGTCTCGATCATAACCCGGTGA                                     |                    |
| Pst_12806 <sup>65-156</sup> -F     | cccatggATATGCATCCGCTTCTCCAAC                                       |                    |
| Pst_12806 <sup>65-156</sup> -R     | cgactagtATGAGCTTGGACGAGCACC                                        |                    |
| Pst_12806-F                        | cccatggATATGGGGCGATCAGGGCT                                         | Sublocalization    |
| Pst_12806-R                        | cgactagtATGAGCTTGGACGAGCACC                                        |                    |
| GFP-Pst_12806 <sup>24-156</sup> -F | GGGGACAAGTTTGTACAAAAAGCAGGCTTC ATGGCGATCAGGGCTGTTG                 |                    |
| GFP-Pst_12806 <sup>24-156</sup> -R | GGGGACCACTTTGTACAAGAAAGCTGGGTCATGAGCTTGGACGAGCACC                  |                    |
| CTP1-CFP-S                         | ccatggCCATGGACTAGTATGCAGGGTCGAGCAATCT                              |                    |
| CTP1-CFP-AS                        | GCCCTTGCTCACCATCAAAGGACAATTTGGTCCGTTTC                             |                    |
| Pst_12806-F                        | gtaccgggATGGCCGCCACCTC                                             |                    |
| Pst_12806-R                        | ataagaatcgggcgcAGCGTAGTCTGGGACGTCGTATGGGTAATGAGCTTGGACGAGCACC      |                    |
| Pst_12806 <sup>24-156</sup> -F     | ggcatgatATGGCGATCAGGGCTGTT                                         |                    |
| Pst_12806 <sup>24-156</sup> -R     | catgtcgacAGCGTAGTCTGGGACGTCGTATGGGTAATGAGCTTGGACGAGCACC            |                    |
| Avr1b-F                            | gtaccgggACTGAGTACTCCGACGAAACC                                      | Suppression of PCD |
| Avr1b-R                            | ataagaatcgggcgcGCTCTGATACAGGTGAAAG                                 |                    |
| BAX-F                              | gtaccgggATGGACGGGTCCGGG                                            |                    |
| BAX-R                              | ataagaatcgggcgcGCCATCTTCTTCCAG                                     |                    |
| eGFP-F                             | gtaccgggATGGTAGATCTGACTAGTCTTAGG                                   |                    |
| eGFP-R                             | ataagaatcgggcgcCTTGTACAGCTCGTCCAT                                  |                    |
| Pst_12806-GY-F                     | GGGGACAAGTTTGTACAAAAAGCAGGCTTCGCGATCAGGGCTGTTG                     | Suppression of PTI |
| Pst_12806-GY-R                     | GGGGACCACTTTGTACAAGAAAGCTGGGTCCTCAATGAGCTTGGACGAG                  |                    |
| Pst_12806-vigs-F1                  | ataTTAATTAATACTTCAGTCTGTCTTGCTCGC                                  |                    |
| Pst_12806-vigs-R1                  | tatGCGGCCGCTGACTAAGTTGGAGAAGCGGAT                                  |                    |
| Pst_12806-vigs-F2                  | ataTTAATTAACCTGACCCGGAACCAAA                                       | Silencing assay    |
| Pst_12806-vigs-R2                  | tatGCGGCCCGCAATACGCCACCGGAG                                        |                    |
| TalSP-vigs-F                       | ataTTAATTAACCTCACCCTCCAACC                                         |                    |
| TalSP-vigs-R                       | tatGCGGCCCGCGAGCATGCCGAAGGTG                                       |                    |
| Pst_12806-qRT-F2                   | ACTCCTACTTCAGTCTGTCTTGCTC                                          |                    |
| Pst_12806-qRT-R2                   | TGCTATTAGTCTTAGTGGCCTTTG                                           |                    |
| Pst_12806-qRT-F1                   | C TTCAGTCTGTCTTGCTCGC                                              |                    |
| Pst_12806-qRT-R1                   | GGGGTCGGCTTTGGTT                                                   |                    |
| PstEF1-F                           | TTCCCGTCCGTGATATGAGACAA                                            |                    |
| PstEF1-R                           | ATGCGTATCATGGTGGTGGAGTGA                                           |                    |
| TaEF-F                             | TGGTGTATCAAGCCTGGTATGGT                                            |                    |
| TaEF-R                             | ACTCATGGTGCATCTCAACGGACT                                           |                    |

|                                |                                               |                 |
|--------------------------------|-----------------------------------------------|-----------------|
| NbAct-F                        | GTTGCTATACAAGCTGTTCTCTCG                      |                 |
| NbAct-R                        | GTCAAGACGAAGAATGACATGTGG                      |                 |
| NbPR1a-F                       | CGACCAGGTAGCAGCCTATG                          |                 |
| NbPR1a-R                       | TCTCAACAGCCTTAGCAGCC                          |                 |
| NbPR2-F                        | GGGCTGTTAATTTGCAGTATCC                        |                 |
| NbPR2-R                        | GGTTTATAACATCTTGGTCTGATGG                     |                 |
| NbWRKY12-F                     | CTCATCAGCTAGTTCATTTGATGC                      | qRT-PCR         |
| NbWRKY12-R                     | AGCTCGGTCTTTGTTCTAAAAGC                       |                 |
| TaPR1-F                        | GAGAATGCAGACGCCAAGC                           |                 |
| TaPR1-R                        | CTGGAGCTTGCAGTCGTTGATC                        |                 |
| TaPR2-F                        | AGGATGTTGCTTCCATGTTTGCCG                      |                 |
| TaPR2-R                        | AAGTAGATGCGCATGCCGTTGATG                      |                 |
| TaPR5-F                        | CAAGCAGTGGTATCAACGCAGAG                       |                 |
| TaPR5-R                        | GTGAAGCCACAGTTGTTCTTGATGTT                    |                 |
| TaISP-2A-F                     | GGCCTTACTGGTTTCGTAAATC                        |                 |
| TaISP-2A-R                     | GATGAGGCGGGTTATAT                             |                 |
| TaISP-2B-F                     | CAGTCCTAAGAACGCTGCTATA                        |                 |
| TaISP-2B-R                     | GTCGCTACATCGTAGTACCAG                         |                 |
| TaISP-2D-F                     | ACGCTGCTACATAAGACTACTC                        |                 |
| TaISP-2D-R                     | AGATTCCGAGTCCTCAAATGT                         |                 |
| Pst_12806SP-F                  | CGGAATTTTAATTAAGAATTCATGGCCCCCACCTCAAACCT     |                 |
| Pst_12806SP-R                  | CACATATAGGGAGAACCTCGAGCCCTCGACATCCTTCCAAGTTGT |                 |
| Pst_12806 <sup>24-156</sup> -F | CGGAATTTTAATTAAGAATTC ATGGCGATCAGGGCTGTTGC    |                 |
| Pst_12806 <sup>24-156</sup> -R | CACATATAGGGAGAACCTCGAGATGAGCTTGGACGAGCACC     | Secretion assay |
